# Supplementary material for: Dioxygen Reactivity of Copper(I)/Manganese(II)-Porphyrin Assemblies: Mechanistic Studies and Cooperative Activation of O2
Source: MDPI journal article supplement (doi:10.3390/molecules27031000), 2022-02-01
Supplement: s1 [file s1]

## Supporting Information:

### Dioxygen Reactivity of Copper(I)/Manganese(II)-Porphyrin Assemblies: Mechanistic Studies and Cooperative Activation of O<sub>2</sub>

Runzi Li, Firoz Shah Tuglak Khan and Shabnam Hematian \*

Department of Chemistry and Biochemistry, University of North Carolina at Greensboro, Greensboro, North Carolina 27412

#### 1. UV-vis Spectroscopy

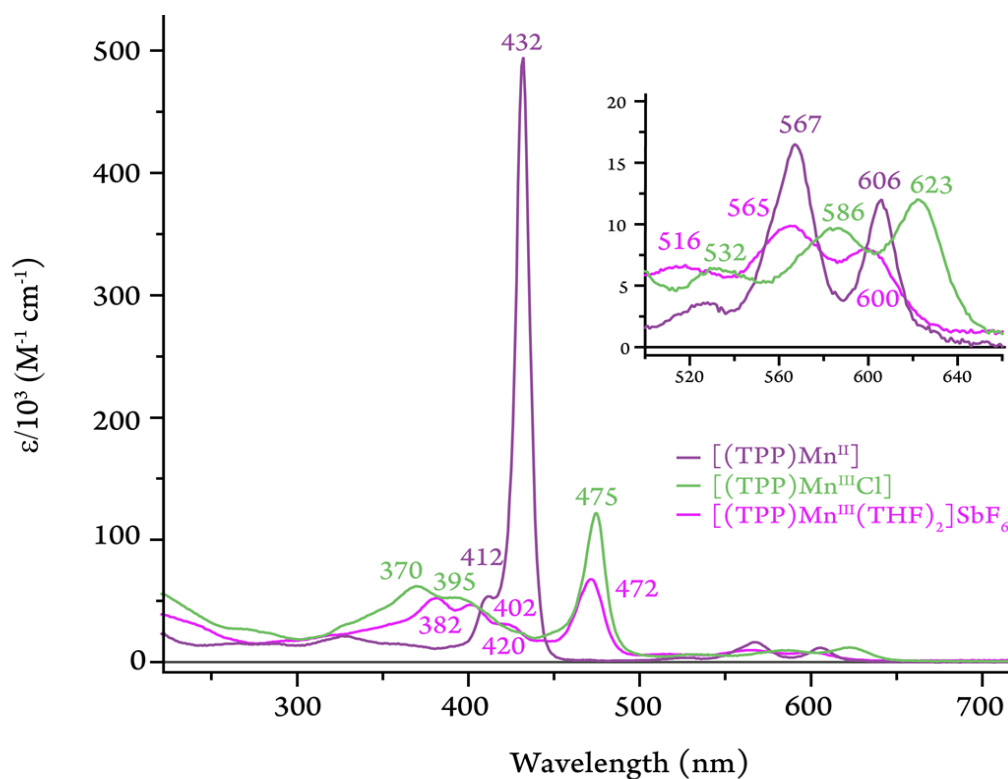

**Figure S1.** Quantitative electronic spectra of  $[(\text{TPP})\text{Mn}^{\text{II}}]$  (purple),  $[(\text{TPP})\text{Mn}^{\text{III}}\text{Cl}]$  (green), and  $[(\text{TPP})\text{Mn}^{\text{III}}(\text{THF})_2]\text{SbF}_6$  (magenta) in MeTHF at room temperature (RT).

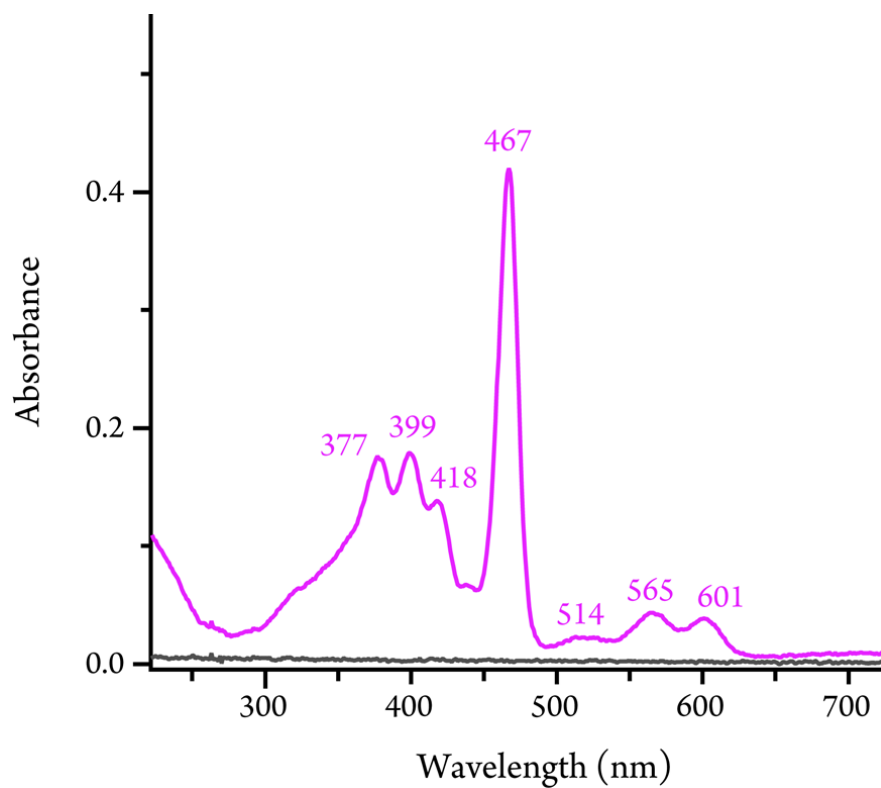

**Figure S2.** UV-vis spectrum of  $[(\text{TPP})\text{Mn}^{\text{III}}(\text{THF})_2]\text{SbF}_6$  in MeTHF at  $-110\text{ }^{\circ}\text{C}$ .

## 2. Crystallographic Studies

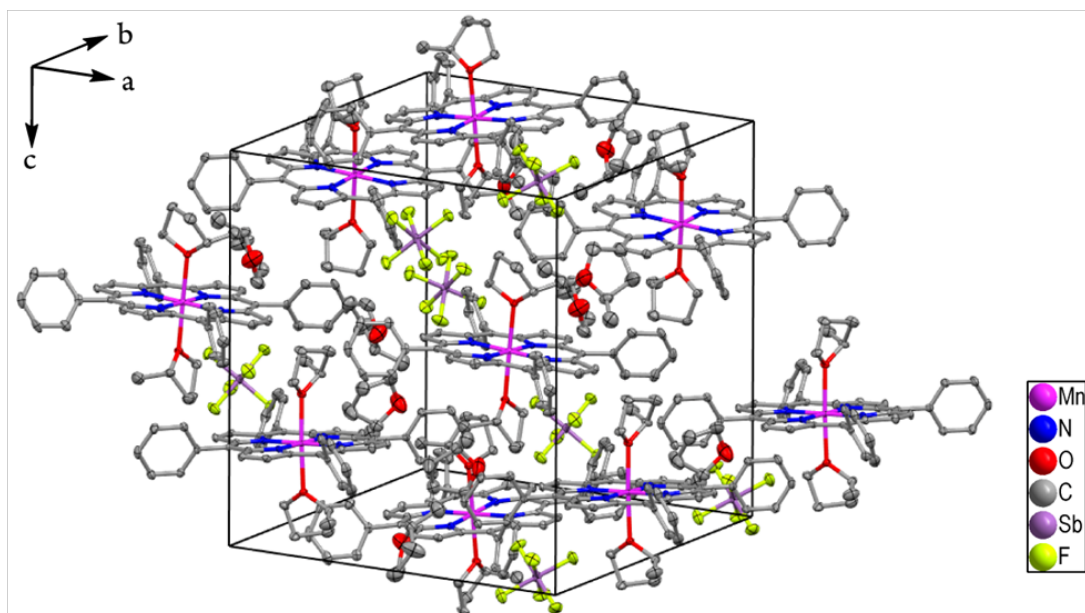

**Figure S3.** Diagram illustrating the molecular packing of  $[(\text{TPP})\text{Mn}^{\text{III}}(\text{MeTHF})_2]\text{SbF}_6 \cdot 2\text{MeTHF}$  at  $100(2)\text{ K}$  (hydrogen atoms have been omitted for clarity).

**Table S1.** Crystallographic Data and Data Collection Parameters for [(TPP)Mn<sup>III</sup>(MeTHF)<sub>2</sub>]SbF<sub>6</sub>·2MeTHF.

|                                         |                                                                                   |
|-----------------------------------------|-----------------------------------------------------------------------------------|
| Formula                                 | C <sub>64</sub> H <sub>68</sub> F <sub>6</sub> MnN <sub>4</sub> O <sub>4</sub> Sb |
| T (K)                                   | 100(2)                                                                            |
| Formula weight                          | 1247.91                                                                           |
| Crystal system                          | Tetragonal                                                                        |
| Space group                             | P 4 <sub>3</sub> 2 <sub>1</sub> 2                                                 |
| a, Å                                    | 17.4544(3)                                                                        |
| b, Å                                    | 17.4544(3)                                                                        |
| c, Å                                    | 18.6564(7)                                                                        |
| α, deg                                  | 90                                                                                |
| β, deg                                  | 90                                                                                |
| γ, deg                                  | 90                                                                                |
| V, Å <sup>3</sup>                       | 5683.8(3)                                                                         |
| Z                                       | 4                                                                                 |
| Radiation (λ, Å)                        | MoKα (0.71073)                                                                    |
| d <sub>calcd</sub> , g·cm <sup>-3</sup> | 1.458                                                                             |
| F(000)                                  | 2568                                                                              |
| Crystal size (mm <sup>3</sup> )         | 0.17 x 0.13 x 0.08                                                                |
| Theta range for data collection         | 2.334 to 25.500 °                                                                 |
| μ, mm <sup>-1</sup>                     | 0.770                                                                             |
| No of unique data                       | 5299                                                                              |
| Completeness to theta                   | 99.9%                                                                             |
| No. of restraints                       | 0                                                                                 |
| No. of params. refined                  | 377                                                                               |
| GOF on F <sup>2</sup>                   | 1.015                                                                             |
| R1 <sup>a</sup> [I > 2σ(I)]             | 0.0359                                                                            |
| R1 <sup>a</sup> (all data)              | 0.0494                                                                            |
| wR2 <sup>b</sup> (all data)             | 0.0859                                                                            |
| Largest diff. peak and hole             | 0.736 and -0.325 e.Å <sup>-3</sup>                                                |

$$^aR1 = \frac{\sum ||F_o| - |F_c||}{\sum |F_o|}; \quad ^b wR2 = \sqrt{\frac{\sum [w(F_o^2 - F_c^2)^2]}{\sum [w(F_o^2)^2]}}$$

**Table S2.** Selected structural parameters for six coordinated Mn(III) porphyrin complexes having bis-axial oxygen ligation in charge neutral ligands.

| Complex                                                                                                           | Mn–O <sub>ax</sub> (Å) <sup>a</sup> | Mn–N <sub>por</sub> (Å) <sup>a</sup> | Reference |
|-------------------------------------------------------------------------------------------------------------------|-------------------------------------|--------------------------------------|-----------|
| [(TPP)Mn <sup>III</sup> (MeTHF) <sub>2</sub> ]SbF <sub>6</sub>                                                    | 2.272(3)                            | 2.008(2)                             | This work |
| [(TPP)Mn <sup>III</sup> (CH <sub>3</sub> OH) <sub>2</sub> ]ClO <sub>4</sub>                                       | 2.261(2)                            | 2.006(2)                             | [1]       |
| [(TPP)Mn <sup>III</sup> ( <i>N,N</i> -dimethylformamide) <sub>2</sub> ]ClO <sub>4</sub>                           | 2.217(4)                            | 2.010(5)                             | [2]       |
| [(TPP)Mn <sup>III</sup> (2,6-lutidine <i>N</i> -oxide) <sub>2</sub> ]ClO <sub>4</sub>                             | 2.264(4)                            | 1.996(4)                             | [3]       |
| [(TPP)Mn <sup>III</sup> (H <sub>2</sub> O) <sub>2</sub> ]ClO <sub>4</sub>                                         | 2.271(2)                            | 2.004(2)                             | [4]       |
| [(TPP)Mn <sup>III</sup> (CH <sub>3</sub> OH) <sub>2</sub> ]SbCl <sub>6</sub>                                      | 2.283(5)                            | 2.002(2)                             | [5]       |
| [(TPP)Mn <sup>III</sup> (ONC <sub>6</sub> H <sub>4</sub> NEt <sub>2</sub> ) <sub>2</sub> ]SbF <sub>6</sub>        | 2.211(4)                            | 2.016 (4)                            | [6]       |
| [(DHPP) <sup>b</sup> Mn <sup>III</sup> (THF) <sub>2</sub> ]Cl                                                     | 2.320(2)                            | 2.004(2)                             | [7]       |
| [(TPP)Mn <sup>III</sup> (THF) <sub>2</sub> ][(Pc <sup>c</sup> )Co <sup>III</sup> (L <sup>d</sup> ) <sub>2</sub> ] | 2.307(2)                            | 2.007(2)                             | [8]       |

<sup>a</sup> Average value; <sup>b</sup> DHPP corresponds to 5,10,15,20-Tetrakis(3',5'-dihydroxyphenyl)porphyrinato; <sup>c</sup> Pc corresponds to phthalocyaninato; <sup>d</sup> L corresponds to 1-phenyl-1H-tetrazole-5-thiolate.

### 3. NMR Spectroscopy

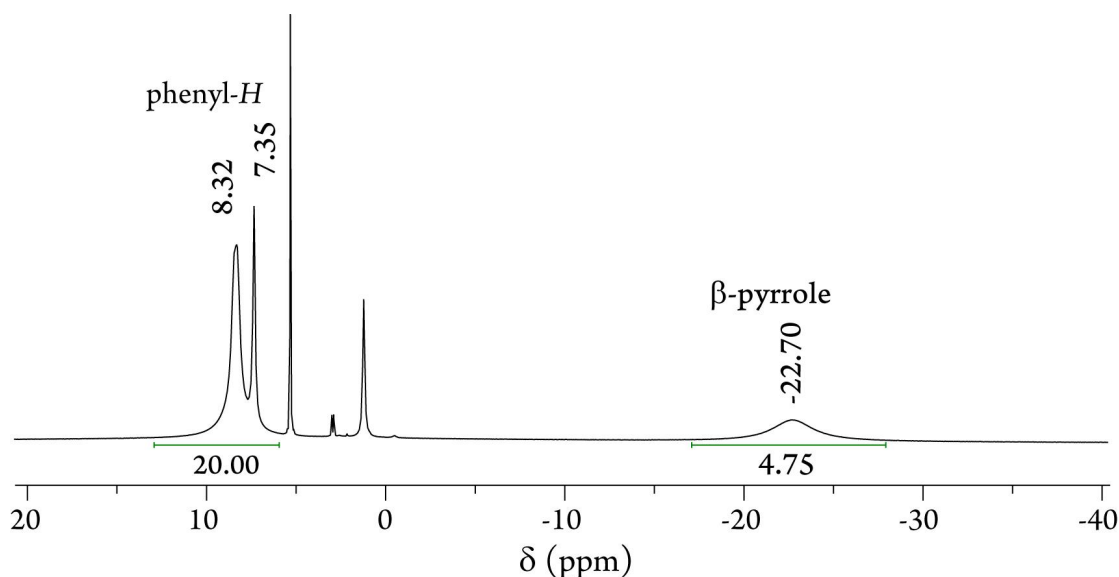

**Figure S4.** <sup>1</sup>H-NMR spectrum of [(TPP)Mn<sup>III</sup>Cl] recorded in CD<sub>2</sub>Cl<sub>2</sub> at room temperature.

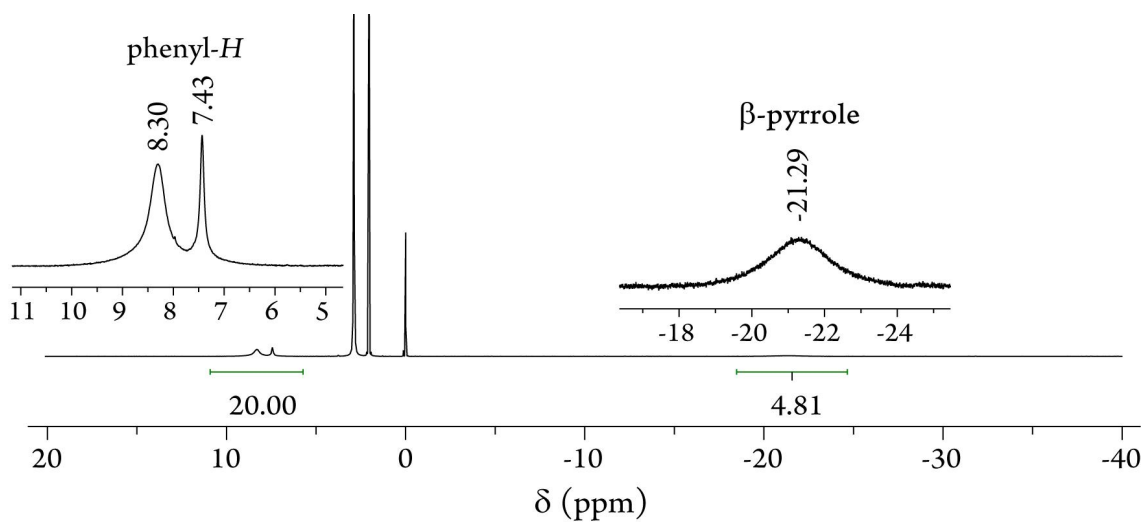

**Figure S5.**  $^1\text{H}$ -NMR spectrum of  $[(\text{TPP})\text{Mn}^{\text{III}}\text{Cl}]$  recorded in acetone- $d_6$  at room temperature.

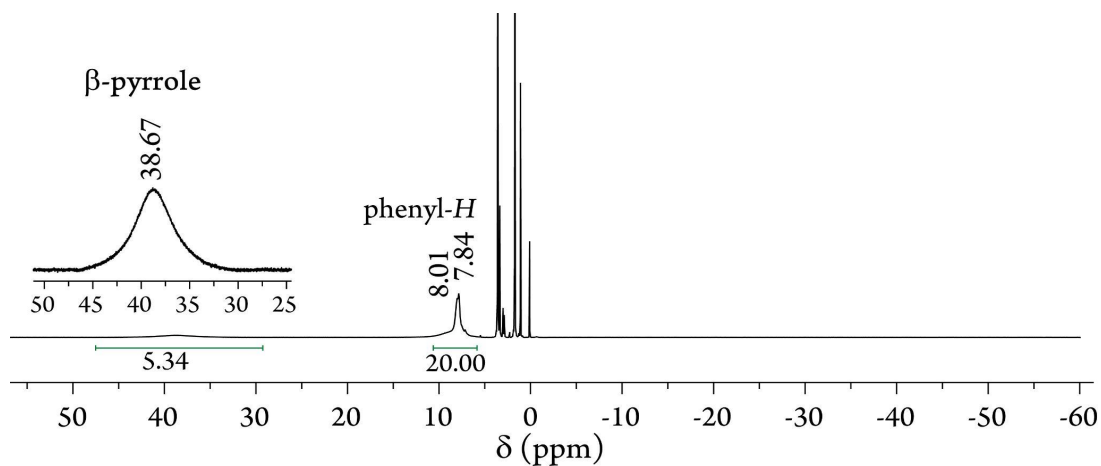

**Figure S6.**  $^1\text{H}$ -NMR spectrum of  $[(\text{TPP})\text{Mn}^{\text{II}}]$  recorded in THF- $d_8$  at room temperature.

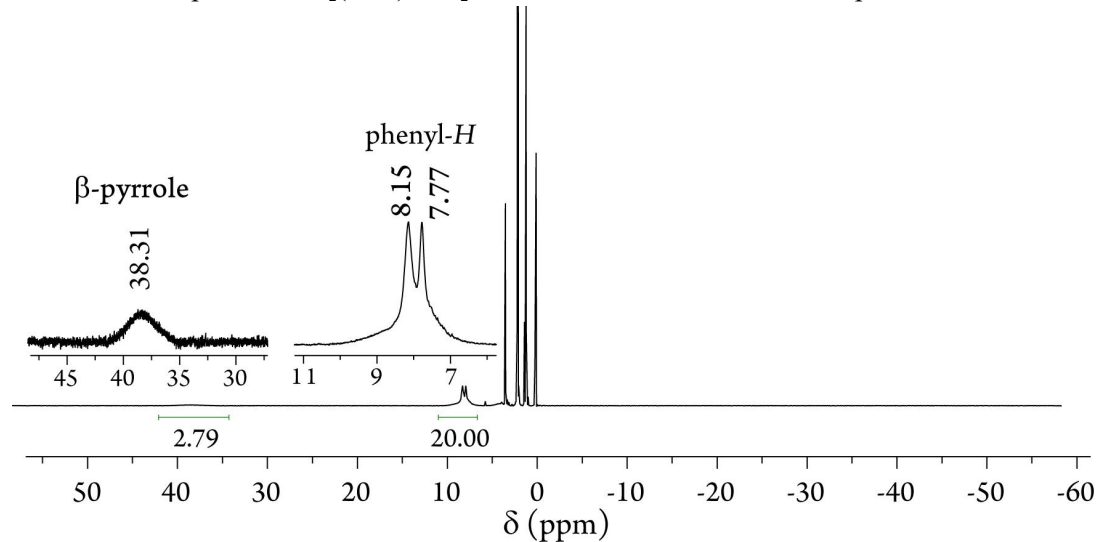

**Figure S7.**  $^1\text{H}$ -NMR spectrum of  $[(\text{TPP})\text{Mn}^{\text{II}}]$  recorded in acetone- $d_6$  at room temperature.

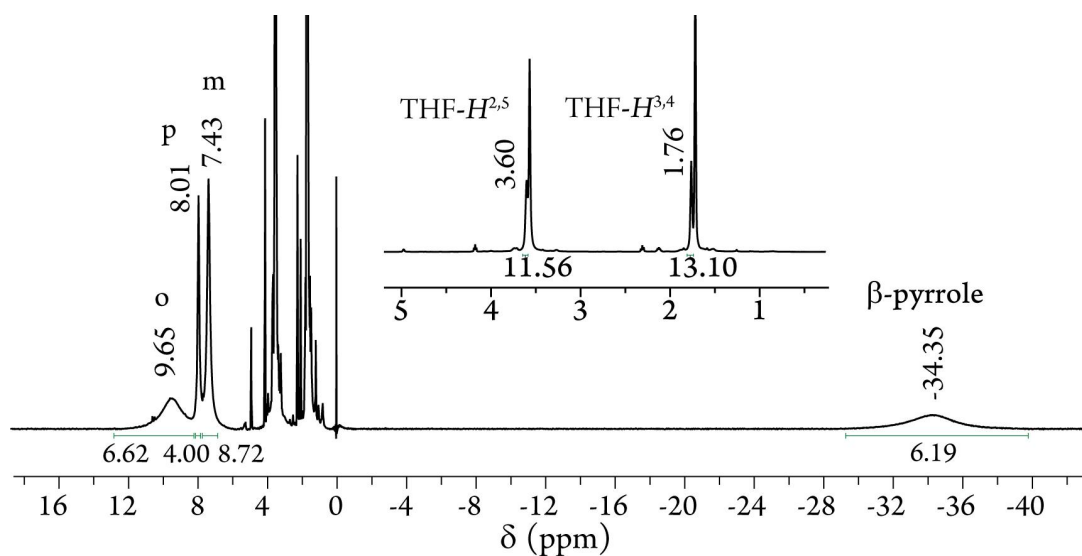

**Figure S8.**  $^1\text{H}$ -NMR spectrum of  $[(\text{TPP})\text{Mn}^{\text{III}}(\text{THF})_2]\text{SbF}_6$  recorded in  $\text{THF}-d_8$  at room temperature.

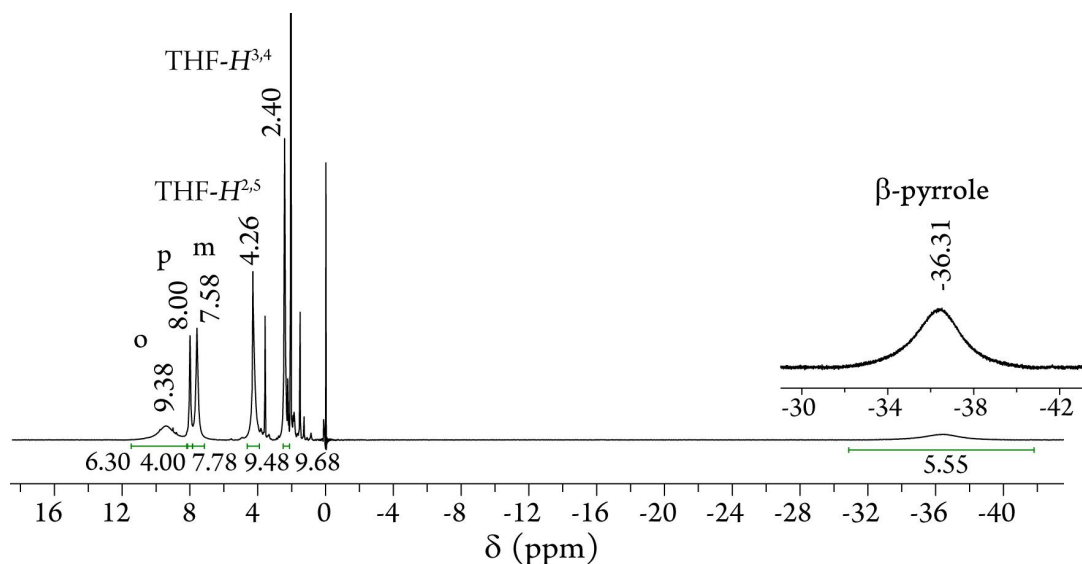

**Figure S9.**  $^1\text{H}$ -NMR spectrum of  $[(\text{TPP})\text{Mn}^{\text{III}}(\text{THF})_2]\text{SbF}_6$  recorded in  $\text{acetone}-d_6$  at room temperature.

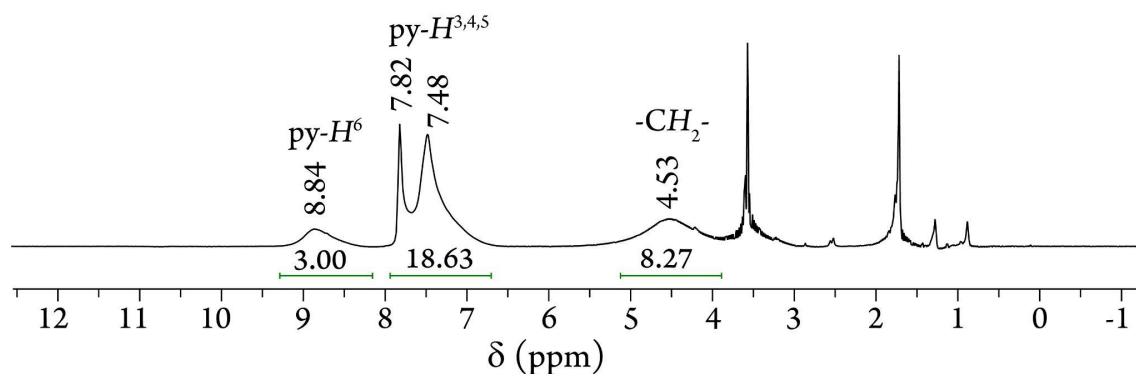

**Figure S10.**  $^1\text{H}$ -NMR spectrum of  $[(\text{tmpa})\text{Cu}^{\text{I}}(\text{MeCN})][\text{B}(\text{C}_6\text{F}_5)_4]$  recorded in  $\text{THF}-d_8$  at room temperature.

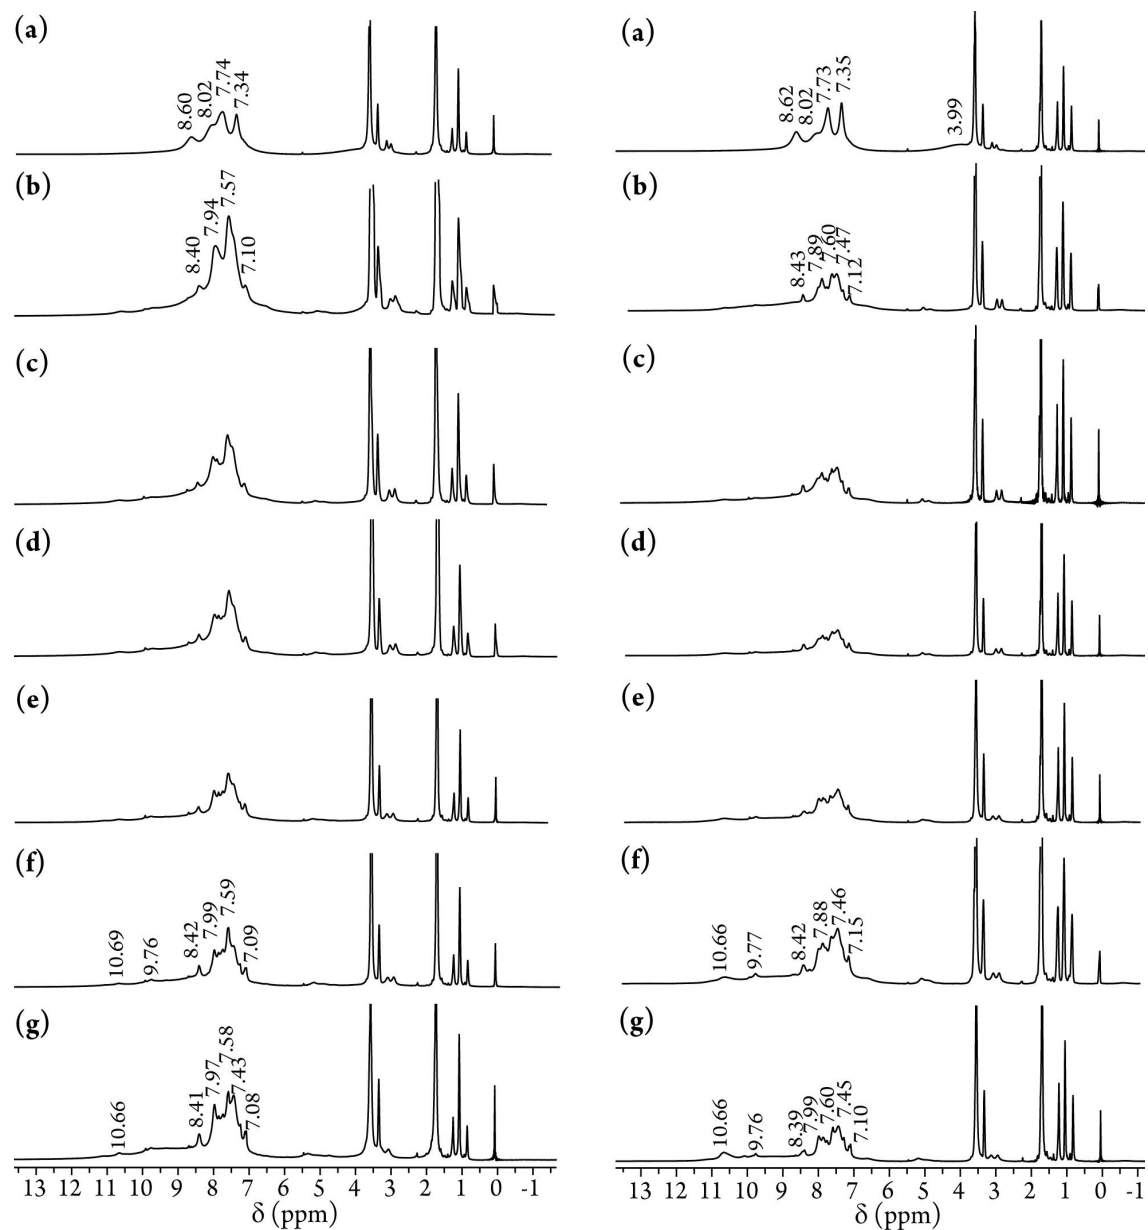

**Figure S11.**  $^1\text{H}$ -NMR spectra (selected portions only) ( $\text{THF-}d_8$ , room temperature) of the oxygenation reaction of a 1:1 mixture, *Left*, and 1:2 mixture, *Right*, of  $[(\text{TPP})\text{Mn}^{\text{II}}]$  and  $[(\text{tmpa})\text{Cu}^{\text{I}}(\text{MeCN})][\text{B}(\text{C}_6\text{F}_5)_4]$  at different time intervals: (a) 0 min, (b) 1 min, (c) 15 min, (d) 1 h 30 min, (e) 4 h 30 min, (f) 6 h, and (g) 18 h.

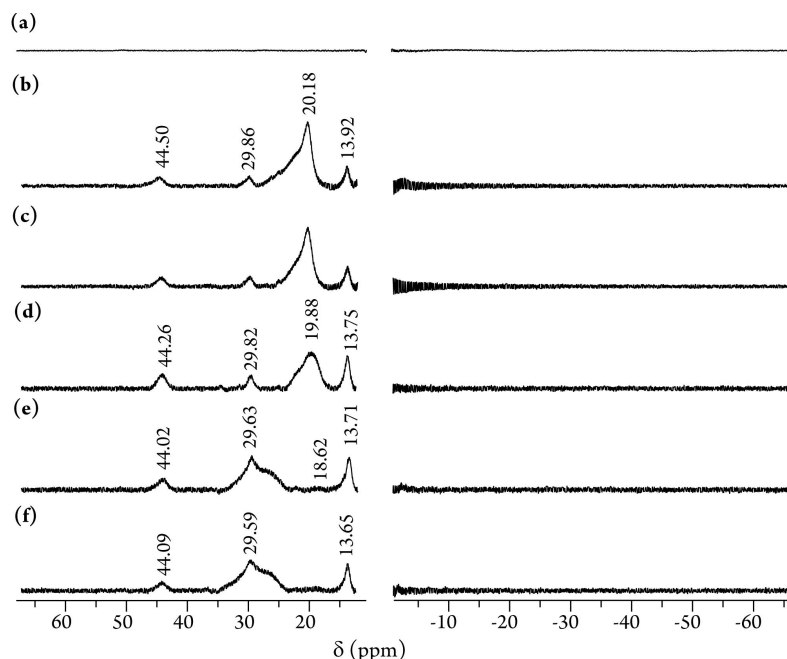

**Figure S12.**  $^1\text{H}$ -NMR spectra (selected portions only) ( $\text{THF-}d_8$ , room temperature) of the oxygenation reaction of  $[(\text{tmpa})\text{Cu}^{\text{I}}(\text{MeCN})][\text{B}(\text{C}_6\text{F}_5)_4]$  at (a) 0 min, (b) 1 min, (c) 15 min, (d) 1 h 30 min, (e) 4 h 30 min, and (f) 6 h.

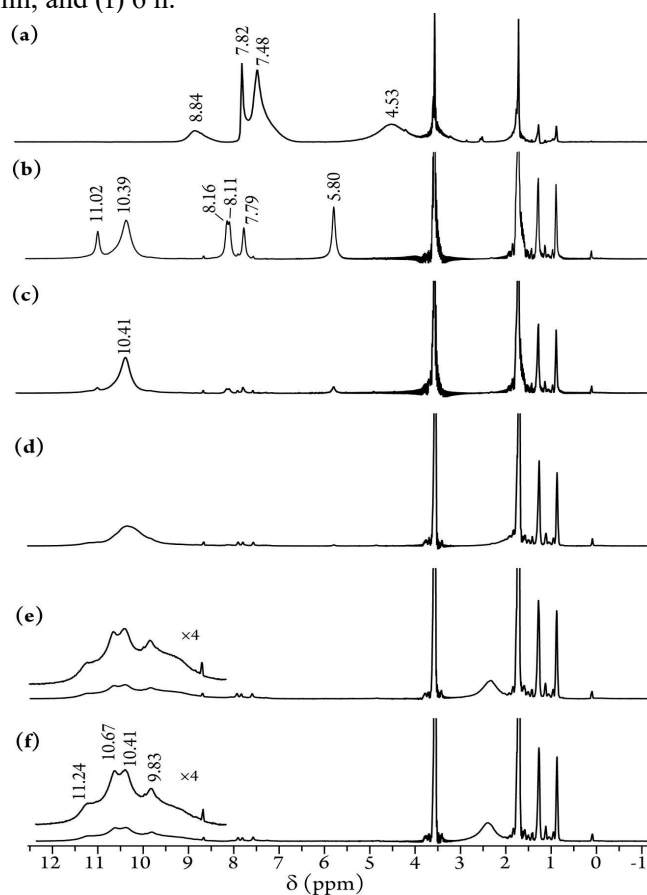

**Figure S13.**  $^1\text{H}$ -NMR spectra (selected portions only) ( $\text{THF-}d_8$ , room temperature) of the oxygenation reaction of  $[(\text{tmpa})\text{Cu}^{\text{I}}(\text{MeCN})][\text{B}(\text{C}_6\text{F}_5)_4]$  at (a) 0 min, (b) 1 min, (c) 15 min, (d) 1 h 30 min, (e) 4 h 30 min, and (f) 6 h.



#### 4. Infrared (IR) Spectroscopy

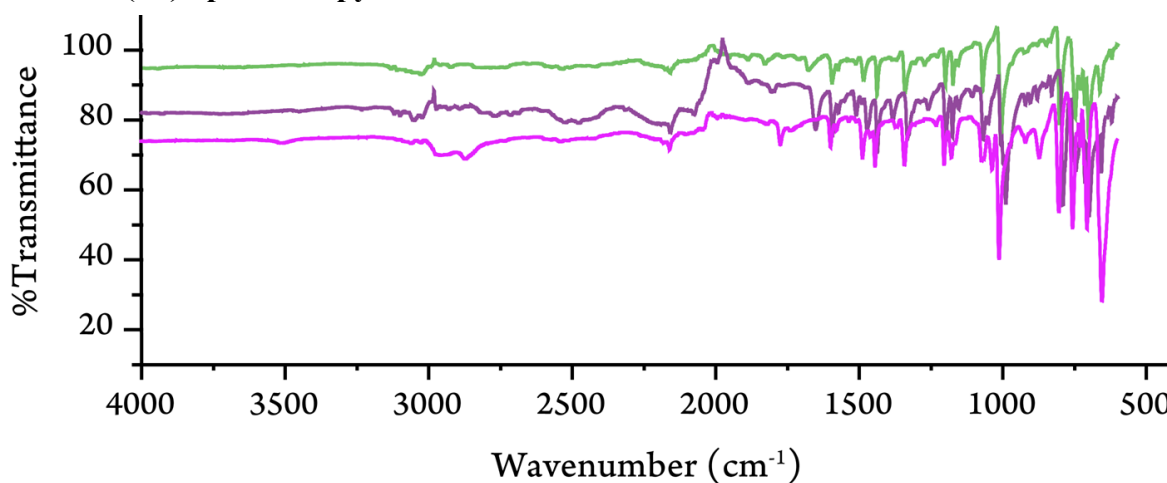

**Figure S14.** IR spectra of [(TPP)Mn<sup>II</sup>] (purple), [(TPP)Mn<sup>III</sup>]Cl (green), and [(TPP)Mn<sup>III</sup>(THF)<sub>2</sub>]SbF<sub>6</sub> (magenta).

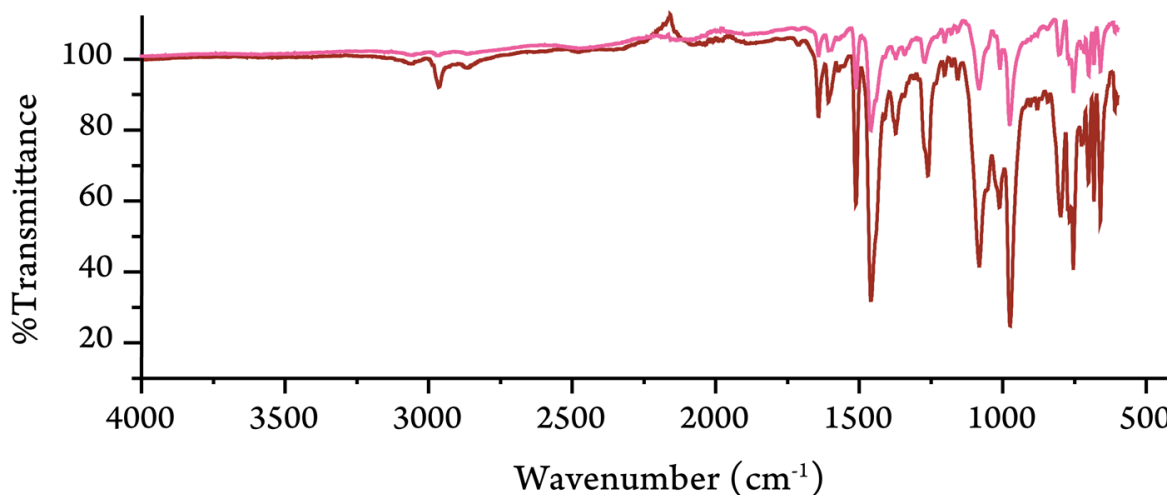

**Figure S15.** IR spectra of oxygenation products of [(TPP)Mn<sup>II</sup>] with: 1 eq. of [(tmpa)Cu<sup>I</sup>(MeCN)][B(C<sub>6</sub>F<sub>5</sub>)<sub>4</sub>] (pink) or 2 eq. of [(tmpa)Cu<sup>I</sup>(MeCN)][B(C<sub>6</sub>F<sub>5</sub>)<sub>4</sub>] (maroon).

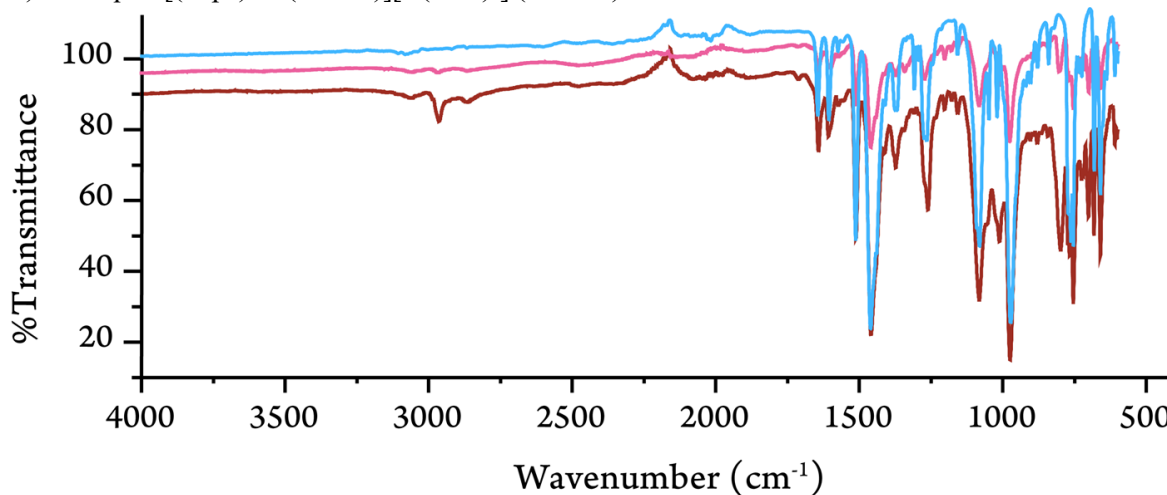

**Figure S16.** IR spectra of [(tmpa)Cu<sup>II</sup>]Cl[B(C<sub>6</sub>F<sub>5</sub>)<sub>4</sub>] (blue) and the oxygenation products of [(TPP)Mn<sup>II</sup>] with: 1 eq. of [(tmpa)Cu<sup>I</sup>(MeCN)][B(C<sub>6</sub>F<sub>5</sub>)<sub>4</sub>] (pink) or 2 eq. of [(tmpa)Cu<sup>I</sup>(MeCN)][B(C<sub>6</sub>F<sub>5</sub>)<sub>4</sub>] (maroon).

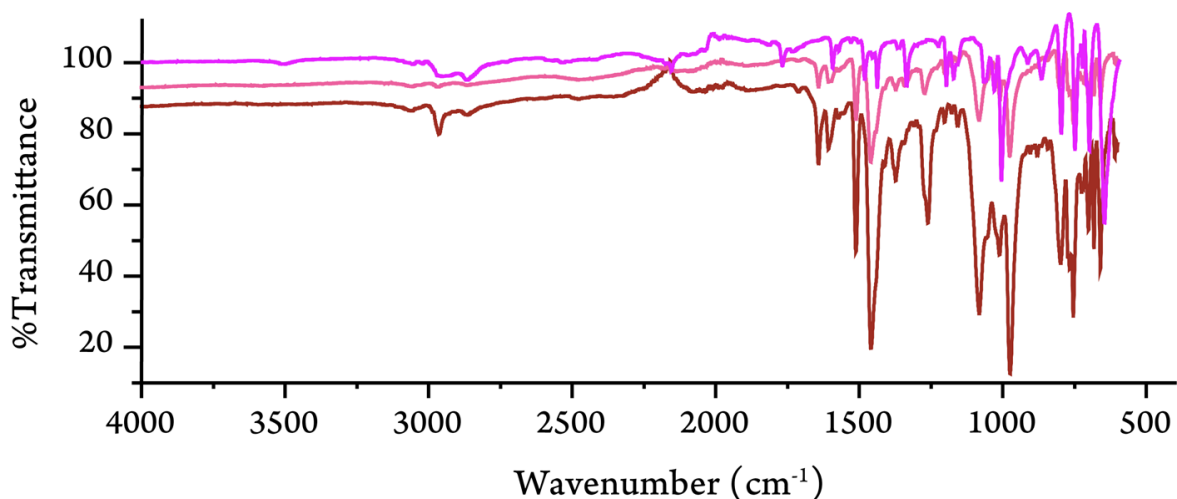

**Figure S17.** IR spectra of  $[(\text{TPP})\text{Mn}^{\text{III}}(\text{THF})_2]\text{SbF}_6$  (magenta) and the oxygenation products of  $[(\text{TPP})\text{Mn}^{\text{II}}]$  with: 1 eq. of  $[(\text{tmpa})\text{Cu}^{\text{I}}(\text{MeCN})][\text{B}(\text{C}_6\text{F}_5)_4]$  (pink) or 2 eq. of  $[(\text{tmpa})\text{Cu}^{\text{I}}(\text{MeCN})][\text{B}(\text{C}_6\text{F}_5)_4]$  (maroon).

**Table S3.** Metal-sensitive IR bands ( $\text{cm}^{-1}$ ) of TPP manganese complexes.\*

| TPP  | $[(\text{TPP})\text{Mn}^{\text{II}}]$ | $[(\text{TPP})\text{Mn}^{\text{III}}\text{Cl}]$ | $[(\text{TPP})\text{Mn}^{\text{III}}(\text{THF})_2]\text{SbF}_6$ | 1:1 eq. Product | 1:2 eq. Product |
|------|---------------------------------------|-------------------------------------------------|------------------------------------------------------------------|-----------------|-----------------|
| 1596 | 1594                                  | 1595                                            | 1598                                                             | 1598            | 1598            |
| 1491 | 1473                                  | 1486                                            | 1487                                                             | 1487 (sh)       | 1487 (sh)       |
| 1350 | 1333                                  | 1341                                            | 1340                                                             | 1342            | 1342            |
| 1003 | 990                                   | 1006                                            | 1010                                                             | 1010            | 1011            |
| 966  | 972                                   | 966 (sh)                                        | 971                                                              | (very broad)    | (very broad)    |

\* TPP data from Ref. [9]. TPP: Tetraphenylporphyrin. “1:1 eq. Product” and “1:2 eq. Product” refer to the oxygenation products of 1:1 and 1:2 eq. mixtures of  $[(\text{TPP})\text{Mn}^{\text{II}}]$  and  $[(\text{tmpa})\text{Cu}^{\text{I}}(\text{MeCN})][\text{B}(\text{C}_6\text{F}_5)_4]$ , respectively.

## References

1. Hatano, K.; Anzai, K.; Iitaka, Y. The crystal and molecular structure of bis(methanol)- $\alpha,\beta,\gamma,\delta$ -tetraphenylporphinatomanganese(III) perchlorate-methanol. A molecular structure relevant to the intermediate-spin six coordinate iron(III) porphyrin. *Bull. Chem. Soc. Jpn.* **1983**, *56*, 422-427, 10.1246/bcsj.56.422.
2. Hill, C.L.; Williamson, M.M. Structural and electronic properties of six-coordinate manganese(III) porphyrin cations. Crystal and molecular structure of bis(N,N-dimethylformamide)(tetraphenylporphinato)manganese(III) perchlorate,  $[\text{Mn}^{\text{III}} \text{TPP}(\text{DMF})_2]^+ \text{ClO}_4^-$ . *Inorg. Chem.* **1985**, *24*, 2836-2841, 10.1021/ic00212a027.
3. Hill, C.L.; Williamson, M.W. Electronic and structural properties of a reactive metalloporphyrin with N-oxide axial ligands. Crystal and molecular structure of bis(2,6-lutidine N-oxide)(tetraphenylporphinato)manganese(III) perchlorate. *Inorg. Chem.* **1985**, *24*, 3024-3030, 10.1021/ic00213a031.
4. Williamson, M.N.; Hill, C.L. Molecular stereochemistry of aquamanganese(III) porphyrins. Demonstrable effect of  $\pi$ -arene-porphyrin interaction in the metal coordination environment in the metalloporphyrin. *Inorg. Chem.* **1987**, *26*, 4155-4160, 10.1021/ic00272a005.

5. Scheidt, W.R.; Pearson, W.B.; Gosal, N. Structure of bis-(methanol)(meso-tetra-phenylporphinato)manganese(III) hexa-chloro-antimonate bis-(tetra-chloro-ethane) solvate. *Acta Cryst.* **1988**, *C44*, 927–929, 10.1107/S0108270187012411.
6. Fox, S.J.; Chen, L.; Khan, M.A.; Richter-Addo, G.B. Nitrosoarene complexes of manganese porphyrins. *Inorg. Chem.* **1997**, *36*, 6465-6467, 10.1021/ic970836b.
7. Bhyrappa, P.; Wilson, S.R.; Suslick, K.S. Hydrogen-bonded porphyrinic solids: Supramolecular networks of octahydroxy porphyrins. *J. Am. Chem. Soc.* **1997**, *119*, 8492-8502, 10.1021/ja971093w.
8. Tong, S.-l.; Zhang, J.; Yan, Y.; Hu, S.; Yu, J.; Yu, L. Self-assembled supramolecular architecture with alternating porphyrin and phthalocyanine, bonded by hydrogen bonding and  $\pi$ - $\pi$  stacking. *Solid State Sci.* **2011**, *13*, 1967-1971, 10.1016/j.solidstatesciences.2011.08.026.
9. Kincaid, J.; Nakamoto, K. Vibrational spectra of transition metal complexes of tetraphenylporphine. *J. Inorg. Nucl. Chem.* **1975**, *37*, 85-89, 10.1016/0022-1902(75)80130-8.
